# Supplementary material for: Investigating a Possible Correlation between NOAA-Satellite-Detected Electron Precipitations and South Pacific Tectonic Events
Source: MDPI journal article supplement (doi:10.3390/rs16061059), 2024-03-16
Supplement: s1 [file s1]

**Table S1.** A list of 61 earthquakes is considered for this work and taken from the USGS catalogue.

| Time<br>[day/month/year<br>hour:seconds] | Latitude<br>[degrees] | Longitude<br>[degrees] | Depth<br>[km] | Magnitude |
|------------------------------------------|-----------------------|------------------------|---------------|-----------|
| 19/05/2023 02:57                         | -23.185               | 170.763                | 18            | 7.7       |
| 24/04/2023 00:41                         | -29.992               | -177.811               | 29            | 7.1       |
| 16/03/2023 01:56                         | -30.174               | -176.205               | 10            | 7.0       |
| 08/01/2023 12:32                         | -14.9464              | 166.8808               | 29            | 7.0       |
| 04/12/2022 19:24                         | -15.3497              | -172.9867              | 38            | 6.8       |
| 22/11/2022 02:03                         | -9.8198               | 159.6033               | 14            | 7.0       |
| 11/11/2022 10:48                         | -19.2881              | -172.1471              | 37            | 7.3       |
| 14/08/2022 13:44                         | -32.7361              | -179.0088              | 30            | 6.6       |
| 26/05/2022 15:37                         | -22.8282              | 172.1298               | 15            | 6.6       |
| 30/03/2022 20:56                         | -22.666               | 170.3659               | 10            | 6.9       |
| 29/01/2022 02:46                         | -29.5642              | -176.7217              | 8             | 6.5       |
| 20/06/2021 17:05                         | -30.2162              | -177.8449              | 25            | 6.5       |
| 21/05/2021 22:13                         | -16.6009              | -177.3725              | 10            | 6.5       |
| 04/03/2021 19:28                         | -29.7228              | -177.2794              | 29            | 8.1       |
| 10/02/2021 13:19                         | -23.0511              | 171.6566               | 10            | 7.7       |
| 18/06/2020 12:49                         | -33.2927              | -177.8571              | 10            | 7.4       |
| 04/11/2019 22:43                         | -18.5747              | -175.272               | 10            | 6.6       |
| 15/06/2019 22:55                         | -30.6441              | -178.0995              | 46            | 7.3       |
| 14/05/2019 12:58                         | -4.051                | 152.5967               | 10            | 7.6       |

|                  |          |           |    |     |
|------------------|----------|-----------|----|-----|
| 15/01/2019 18:06 | -13.336  | 166.8752  | 35 | 6.6 |
| 05/12/2018 04:18 | -21.9496 | 169.4266  | 10 | 7.5 |
| 16/10/2018 01:03 | -21.7427 | 169.5217  | 17 | 6.5 |
| 10/10/2018 20:48 | -5.7012  | 151.2046  | 39 | 7.0 |
| 29/08/2018 03:51 | -22.0295 | 170.1262  | 21 | 7.1 |
| 21/08/2018 22:32 | -16.0315 | 168.1428  | 9  | 6.5 |
| 29/03/2018 21:25 | -5.5321  | 151.4999  | 35 | 6.9 |
| 08/03/2018 17:39 | -4.3762  | 153.1996  | 23 | 6.8 |
| 19/11/2017 22:43 | -21.3246 | 168.6715  | 10 | 7.0 |
| 04/11/2017 09:00 | -15.3197 | -173.1682 | 10 | 6.8 |
| 31/10/2017 00:42 | -21.6971 | 169.1485  | 24 | 6.7 |
| 03/01/2017 21:52 | -19.3733 | 176.0518  | 12 | 6.9 |
| 08/12/2016 17:38 | -10.6812 | 161.3273  | 40 | 7.8 |
| 17/10/2016 06:14 | -6.0033  | 148.8871  | 42 | 6.8 |
| 01/09/2016 16:37 | -37.3586 | 179.1461  | 19 | 7.0 |
| 12/08/2016 01:26 | -22.4765 | 173.1167  | 16 | 7.2 |
| 28/04/2016 19:33 | -16.0429 | 167.3786  | 24 | 7.0 |
| 03/04/2016 08:23 | -14.3235 | 166.8551  | 26 | 6.9 |
| 18/11/2015 18:31 | -8.8994  | 158.4217  | 12 | 6.8 |
| 10/08/2015 04:12 | -9.3438  | 158.0525  | 22 | 6.6 |
| 18/07/2015 02:27 | -10.4012 | 165.1409  | 11 | 7.0 |
| 10/07/2015 04:12 | -9.307   | 158.403   | 12 | 6.7 |

|                  |          |           |    |     |
|------------------|----------|-----------|----|-----|
| 20/05/2015 22:48 | -10.8759 | 164.1694  | 11 | 6.8 |
| 07/05/2015 07:10 | -7.2175  | 154.5567  | 10 | 7.1 |
| 01/05/2015 08:06 | -5.2005  | 151.7773  | 44 | 6.8 |
| 30/03/2015 08:48 | -15.4994 | -173.0293 | 11 | 6.5 |
| 29/03/2015 23:48 | -4.7294  | 152.5623  | 41 | 7.5 |
| 07/12/2014 01:22 | -6.5108  | 154.4603  | 23 | 6.6 |
| 16/11/2014 22:33 | -37.6478 | 179.6621  | 22 | 6.7 |
| 04/07/2014 15:00 | -6.2304  | 152.8075  | 20 | 6.5 |
| 29/06/2014 17:15 | -14.9831 | -175.5096 | 18 | 6.7 |
| 23/06/2014 19:19 | -29.9772 | -177.7247 | 20 | 6.9 |
| 19/04/2014 13:28 | -6.7547  | 155.0241  | 43 | 7.5 |
| 12/04/2014 20:14 | -11.2701 | 162.1481  | 22 | 7.6 |
| 11/04/2014 08:16 | -6.7878  | 154.9502  | 20 | 6.5 |
| 02/02/2014 09:26 | -32.9076 | -177.8806 | 44 | 6.5 |
| 16/10/2013 10:30 | -6.4456  | 154.931   | 35 | 6.8 |
| 30/09/2013 05:55 | -30.9255 | -178.3234 | 41 | 6.5 |
| 23/04/2013 23:14 | -3.898   | 152.127   | 10 | 6.5 |
| 14/04/2013 01:32 | -6.475   | 154.607   | 31 | 6.6 |
| 10/03/2013 22:51 | -6.598   | 148.172   | 28 | 6.5 |
| 06/02/2013 01:12 | -10.799  | 165.114   | 24 | 8.0 |

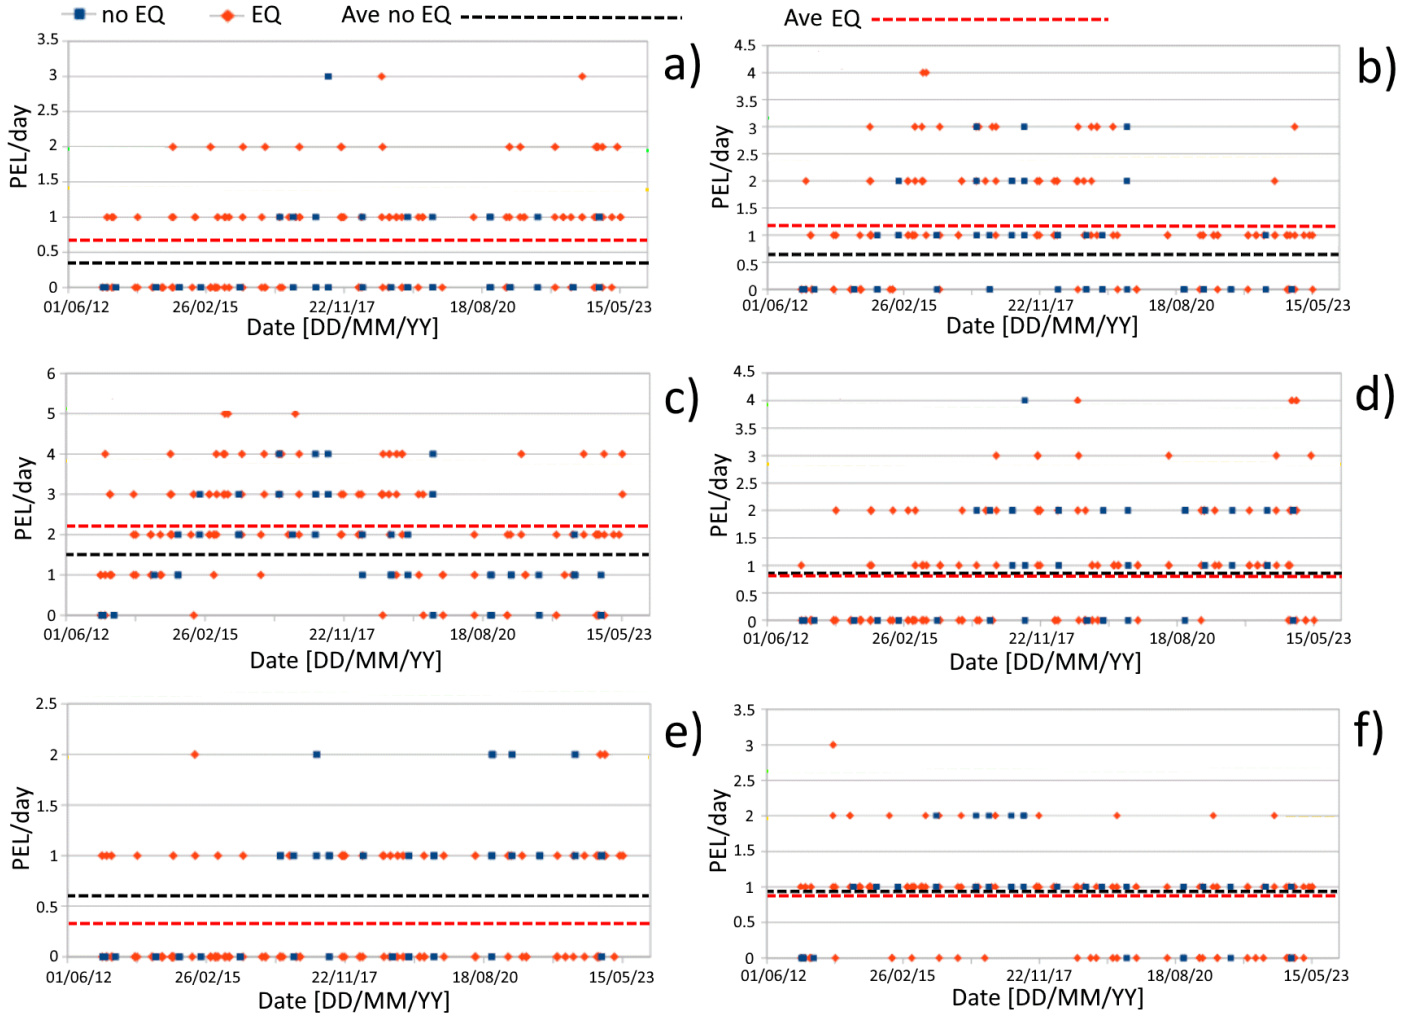

**Figure S1.** A comparison between the daily number of PELs detected in periods with no strong EQs (blue squares), and the daily number of PELs detected in the periods with strong South Pacific EQs. Along (a) ascending semi-orbits (b) descending semi-orbits (c) southern latitudes (d) northern latitudes (e) ascending around SAA semi-orbits (f) descending around SAA semi-orbits. Averages with no EQs are represented by black dotted lines while averages with EQs are represented by red dotted lines.
